# Electrophysiologic Mechanism Underlying Action Potential Prolongation by Sevoflurane in Rat Ventricular Myocytes

Jee Eun Chae, M.S.,\* Duck Sun Ahn, M.D., Ph.D.,† Myung Hee Kim, M.S.,‡ Carl Lynch III, M.D., Ph.D.,§ Wyun Kon Park, M.D.||

**Background:** Despite prolongation of the QTc interval in humans during sevoflurane anesthesia, little is known about the mechanisms that underlie these actions. In rat ventricular myocytes, the effect of sevoflurane on action potential duration and underlying electrophysiologic mechanisms were investigated.

**Methods:** The action potential was measured by using a current clamp technique. The transient outward  $K^+$  current was recorded during depolarizing steps from  $-80$  mV, followed by brief depolarization to  $-40$  mV and then depolarization up to  $+60$  mV. The voltage dependence of steady state inactivation was determined by using a standard double-pulse protocol. The sustained outward current was obtained by addition of  $5$  mM 4-aminopyridine. The inward rectifier  $K^+$  current was recorded from a holding potential of  $-40$  mV before their membrane potential was changed from  $-130$  to  $0$  mV. Sevoflurane actions on L-type  $Ca^{2+}$  current were also obtained.

**Results:** Sevoflurane prolonged action potential duration, whereas the amplitude and resting membrane potential remained unchanged. The peak transient outward  $K^+$  current at  $+60$  mV was reduced by  $18 \pm 2\%$  ( $P < 0.05$ ) and  $24 \pm 2\%$  ( $P < 0.05$ ) by  $0.35$  and  $0.7$  mM sevoflurane, respectively. Sevoflurane had no effect on the sustained outward current. Whereas  $0.7$  mM sevoflurane did not shift the steady state inactivation curve, it accelerated the current inactivation ( $P < 0.05$ ). The inward rectifier  $K^+$  current at  $-130$  mV was little altered by  $0.7$  mM sevoflurane. L-type  $Ca^{2+}$  current was reduced by  $28 \pm 3\%$  ( $P < 0.05$ ) and  $33 \pm 1\%$  ( $P < 0.05$ ) by  $0.35$  and  $0.7$  mM sevoflurane, respectively.

**Conclusions:** Action potential prolongation by clinically relevant concentrations of sevoflurane is due to the suppression of transient outward  $K^+$  current in rat ventricular myocytes.

SEVOFLURANE has been reported to prolong QTc interval in healthy adults<sup>1,2</sup> and children<sup>3,4</sup> during anesthesia induction. Furthermore, sevoflurane has been reported to markedly prolong the QT intervals in children with congenital long QT syndrome.<sup>5,6</sup> In *in vitro* animal preparations using guinea pig ventricular myocardium<sup>7</sup> and myocytes,<sup>8,9</sup> sevoflurane prolonged the action potential (AP) duration. This seemed to be caused by inhibition of the slowly activating delayed outward  $K^+$  current with

minimal effect on the inward rectifier  $K^+$  current ( $I_{K1}$ ). In contrast to this prolonging effect, shortening of AP duration by sevoflurane has also been observed in guinea pig myocardium,<sup>10</sup> canine,<sup>11</sup> and rat ventricular myocytes.<sup>12</sup>

Cardiac AP duration is determined by a balance between inward and outward membrane currents.<sup>13,14</sup> In most species, the transient outward  $K^+$  current ( $I_{to}$ ) is responsible for the initial phase of repolarization, and the L-type  $Ca^{2+}$  current ( $I_{Ca,L}$ ) is the main inward current during the plateau phase. The delayed outward  $K^+$  current ( $I_K$ ) activation initiates repolarization near the end of the ventricular AP plateau, and the  $I_{K1}$  plays an important role in generating the resting membrane potential and in modulating the final repolarization phase of the ventricular AP.<sup>14</sup> The contribution of these currents varies between species and is responsible for the characteristic differences in AP shapes. For example, rat ventricular myocytes possess a prominent  $I_{to}$ , the major outward current of the repolarization phase, but little  $I_K$ , and have a short AP duration. In contrast, guinea pig ventricular cells lack  $I_{to}$ , but have a slowly activating  $I_K$ , resulting in a long-lasting AP.<sup>15</sup>

In rat ventricular myocytes, Rithalia *et al.*<sup>12</sup> observed a shortening effect of sevoflurane on AP duration, attributed to the reduced  $I_{Ca,L}$ , with little effect on  $I_{to}$ . In another recent study<sup>9</sup> using cloned human cardiac  $K^+$  channels, sevoflurane inhibited Kv4.3 cardiac  $K^+$  channel currents, suggesting inhibition of  $I_{to}$ . Based on the similar electrophysiologic characteristics of  $I_{to}$  between human and rat ventricular myocytes,<sup>16</sup> we speculated that the  $I_{to}$  in rat heart cells may be inhibited by sevoflurane. During preliminary experiments, we observed concentration-dependent prolongation of AP duration in rat ventricular myocytes, which contradicted the results of Rithalia *et al.*<sup>12</sup> Therefore, to elucidate the mechanisms of AP prolongation, we examined the effect of sevoflurane on  $I_{to}$  and inward rectifier  $K^+$  current ( $I_{K1}$ ), as well as  $I_{Ca,L}$ .

## Materials and Methods

### Myocyte Isolation

According to a protocol approved by the Yonsei University College of Medicine Animal Research Committee (Seoul, Korea), the heart was quickly excised from rats (Sprague-Dawley, weighing 250–300 g) after halothane anesthesia. The excised heart was retrogradely perfused by using a Langendorff perfusion system for 5 min at  $37^\circ\text{C}$ . The perfusion was at a rate

\* Research Associate, Anesthesia and Pain Research Institute, † Professor, Department of Physiology, || Professor, Department of Anesthesiology and Pain Medicine, Anesthesia and Pain Research Institute, and Brain Korea 21 Project for Medical Science, Yonsei University College of Medicine. ‡ Graduate Student, Department of Biochemistry, Chungnam National University, Daejeon, Korea. § Robert M. Epstein Professor, Department of Anesthesiology, University of Virginia, Charlottesville, Virginia.

Received from the Department of Anesthesiology and Pain Medicine, Yonsei University College of Medicine, Seoul, Korea. Submitted for publication August 31, 2006. Accepted for publication March 13, 2007. Support was provided from the Brain Korea 21 Project for Medical Science, Yonsei University, Seoul, Korea.

Address correspondence to Dr. Park: Department of Anesthesiology and Pain Medicine, Yonsei University College of Medicine, CPO Box 8044, Seoul, Korea. wkp7ark@yumc.yonsei.ac.kr. Information on purchasing reprints may be found at [www.anesthesiology.org](http://www.anesthesiology.org) or on the masthead page at the beginning of this issue. ANESTHESIOLOGY's articles are made freely accessible to all readers, for personal use only, 6 months from the cover date of the issue.

of 7 ml/min with modified Tyrode solution containing 143 mM NaCl, 5.4 mM KCl, 1.8 mM CaCl<sub>2</sub>, 0.5 mM MgCl<sub>2</sub>, 5 mM HEPES, and 0.18 mM glucose, pH 7.4. The perfusate was then switched to a nominally Ca<sup>2+</sup>-free Tyrode solution for 5 min, followed by perfusion with the same solution to which collagenase (0.4 mg/ml, Worthington type II; Worthington Biochemical Corporation, Lakewood, NJ) and hyaluronidase (0.4 mg/ml, Sigma type II; Sigma-Aldrich Co., St. Louis, MO) had been added. After 10–12 min of enzymatic treatment, a final perfusion was performed for 5 min with a Kraftbrühe solution (10 mM taurine, 10 mM oxalic acid, 70 mM glutamic acid, 35 mM KCl, 10 mM H<sub>2</sub>PO<sub>4</sub>, 11 mM glucose, 0.5 mM EGTA, and 10 mM HEPES, pH 7.4). The ventricles were then cut off, minced with scissors, and agitated in a small beaker of a Kraftbrühe solution. The resulting slurry was filtered through a 200- $\mu$ m nylon mesh. The isolated ventricular cells were stored in a Kraftbrühe solution for 1 h at room temperature (21°–22°C), then kept at 4°C, and used within a period of 8 h. Only the rod-shaped cells with apparent striations that remained quiescent in the solution containing 2 mM CaCl<sub>2</sub> were used for the experiments. All experiments were performed at room temperature.

#### Electrophysiologic Techniques

Isolated myocytes were allowed to settle to the bottom of a recording chamber, which was mounted onto an inverted microscope where the bathing solutions could be exchanged. The chamber was continuously perfused at a constant rate (2 ml/min). Standard whole cell voltage clamp methods were used.<sup>17</sup> To establish a stable baseline, an interval of 4–6 min was allowed after initiating the whole cell recording configuration. Voltage clamp measurements were performed by using an Axopatch 200B patch clamp amplifier (Axon Instruments Inc., Foster City, CA). Patch electrodes were prepared from a borosilicate glass model KIMAX-51 (American Scientific, Charlotte, NC), which have a typically 2- to 3-M $\Omega$  resistance when filled with an internal solution. After fabricating the pipettes with a two-stage micropipette puller, the pipette tips were heat-polished by using a microforge. Data acquisition was performed by using a pCLAMP system version 6.0 (Axon Instruments Inc.) coupled with a Pentium-III personal computer.

#### Voltage Clamp Protocols

The APs were elicited in current-clamp mode by 5-ms, 800-pA current injections at a frequency of 1 Hz.

To examine I<sub>to</sub>, from a holding potential of –80 mV, the cells were depolarized to –40 mV for 50 ms to inactivate the Na<sup>+</sup> current and then depolarized to test potentials of up to +60 mV in 10-mV increments for 300 ms. To obtain more information about the possible mechanism of sevoflurane-induced voltage blockade of K<sup>+</sup> currents, the voltage dependence of steady state

inactivation was determined by using a standard double-pulse protocol. The membrane potential was initially clamped at –80 mV and then stepped to different potentials ranging from –100 to 0 mV in 10-mV increments for 500 ms followed by a 200-ms test pulse to +80 mV. The voltage clamp protocol was repeated every 2 s. The steady state inactivation data were fitted by a Boltzmann distribution of the following equation:  $I/I_{\max} = I/[1 + \exp[(V - V_{1/2})/\kappa]]$ , where I<sub>max</sub> is the maximal current, V<sub>1/2</sub> is the membrane potential producing 50% inactivation, and  $\kappa$  is the slope factor.

To test whether the accelerated inactivation of I<sub>to</sub> in the presence of sevoflurane was associated with time-dependent block of the open channel, the magnitude of current inhibition at various times after the initiation of the depolarizing pulse was determined at the membrane potential of +60 mV. The outward current in the presence of each concentration of sevoflurane, expressed as a proportion of the outward current observed in the control, was plotted as a function of time after the start of depolarization. A hyperbola function [ $y = B_{\max}(x/(k_d + x))$ ] was used to fit the rate of block of I<sub>to</sub> at each concentration of sevoflurane. B<sub>max</sub> is the maximum block at drug concentration; K<sub>d</sub> is the dissociation constant.

The sustained outward current (I<sub>sus</sub>) was recorded with the same voltage protocol after addition of 5 mM 4-aminopyridine, which preferentially blocks I<sub>to</sub>, in modified Tyrode solution. The outward currents activated by depolarizing voltage steps in rat ventricular myocytes consist of a rapidly inactivating component, I<sub>to</sub>, and a noninactivating, sustained component, I<sub>sus</sub>.<sup>18,19</sup> The sustained outward currents, comprising I<sub>K</sub> and a small time-independent outward current,<sup>18</sup> remain in the presence of 4-aminopyridine. Whereas I<sub>to</sub> underlies the initial, rapid repolarization phase of the AP, I<sub>sus</sub> is responsible for the slower phase of AP repolarization back to the resting membrane potential in adult rat ventricular myocytes.<sup>20</sup>

The effect on the I<sub>K1</sub> was verified by measuring the I<sub>K1</sub> by step depolarizations from –130 to 0 mV from a holding potential of –40 mV in 10-mV increments, using a 200-ms pulse applied at 5-s intervals.

The voltage-dependent I<sub>Ca,L</sub> was evoked by step depolarizations that lasted 200 ms from a holding potential of –40 mV to +10 mV in one step at a frequency of 0.1 Hz.

After the baseline measurements, myocytes were exposed to 1.7% or 3.4% sevoflurane for 2–3 min, and recovery responses were measured after washes for 2–3 min to remove the drugs. A 2-min application of sevoflurane was sufficient to produce a stable and consistent effect in pilot experiments.

#### Solutions and Chemicals

Before establishing the whole cell recording configuration, modified Tyrode solution, containing 140 mM NaCl, 5.4 mM KCl, 1 mM CaCl<sub>2</sub>, 1 mM MgCl<sub>2</sub>, 5 mM HEPES,

and 10 mM glucose, adjusted to pH 7.4 with 1N NaOH, was used as an external bathing solution. For  $K^+$  current measurements, a patch pipette solution was used, containing 20 mM KCl, 110 mM K-aspartate, 10 mM EGTA, 10 mM HEPES, 1 mM  $MgCl_2$ , 5 mM  $K_2ATP$ , 1 mM  $CaCl_2$ , and 10 mM NaCl, adjusted to pH 7.2 with 3N KOH. To measure  $I_{sus}$ , 5 mM 4-aminopyridine was added to the modified Tyrode solution. As the pH of the modified Tyrode solution containing 4-aminopyridine revealed  $9.04 \pm 0.03$  ( $n = 2$ ), the pH was corrected to 7.4 with HCl before the experiment. To eliminate any confounding  $Ca^{2+}$  current, 0.2 mM  $CdCl_2$  was added to the external solution after establishing the whole cell voltage clamp.

The inward  $Ca^{2+}$  current was measured by using a patch pipette solution containing 30 mM CsCl, 100 mM aspartic acid, 100 mM CsOH, 10 mM BAPTA, 10 mM HEPES, 10 mM phosphocreatine, 1 mM  $Na_2GTP$ , 5 mM  $Na_2ATP$ , 10 mM glucose, and 2 mM  $MgCl_2$ , adjusted to pH 7.2 with 1 M CsOH. Once whole cell recording was achieved, the bathing solution was exchanged to 140 mM NaCl, 5.4 mM CsCl, 2 mM  $CaCl_2$ , 1 mM  $MgCl_2$ , and 10 mM HEPES, adjusted to pH 7.4 with 1 M CsOH. Sevoflurane was purchased from the Abbott Korea Ltd. (Seoul, Korea), and all other chemicals were purchased from Sigma-Aldrich Co. (St. Louis, MO).

Before perfusion, sevoflurane was equilibrated in solution in one reservoir by passing 100%  $O_2$  (flow rate: 0.2 l/min) for 15 min through a sevoflurane vaporizer (Sevotec 3; Ohmeda, West Yorkshire, United Kingdom). The end-tidal concentrations of sevoflurane were monitored by using a calibrated gas analyzer (Capnomac; Datex, Helsinki, Finland). As determined by gas chromatographic measurement, sevoflurane concentrations in the room-temperature Tyrode superfusate equilibrated for 15 min were 0.35 mM ( $n = 4$ ) and 0.7 mM ( $n = 4$ ) for 1.7% and 3.4% sevoflurane, respectively. With the Tyrode solution/gas partition coefficient of sevoflurane of 0.40 at 22°C,<sup>21</sup> 0.35 and 0.7 mM sevoflurane correspond to gas phase concentrations of 2.12% and 4.24%, respectively.

### Statistical Analysis

Repeated measures of analysis of variance followed by the Student-Newman-Keuls test were applied to test for significant differences among control, drug application, and washout. An unpaired *t* test was used to compare the differences in currents of  $I_{to}$ ,  $I_{K1}$ , and  $I_{Ca,L}$  between 1.7% and 3.4% sevoflurane. All values are expressed as mean  $\pm$  SEM. A *P* value less than 0.05 was considered significant.

## Results

### Normal Action Potential

Figure 1 shows concentration-dependent prolongation of AP duration observed in a rat ventricular myocyte. Sevoflurane at 0.35 mM ( $n = 6$ ) prolonged the  $APD_{50}$  and  $APD_{90}$  to  $129 \pm 10\%$  ( $P < 0.05$ ) and  $115 \pm 2\%$  ( $P < 0.05$ ) of the control, respectively. Sevoflurane at 0.7 mM ( $n =$

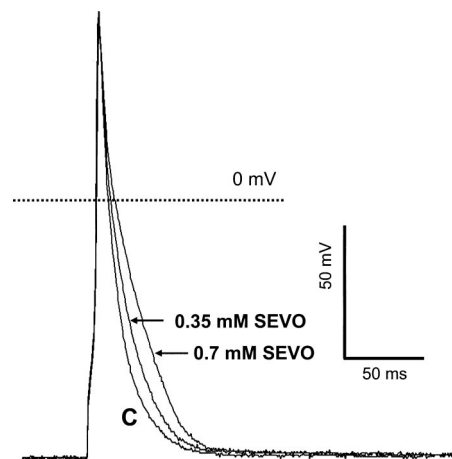

Fig. 1. Effect of sevoflurane (SEVO) on action potential duration in a rat ventricular myocyte. C = control.

7) also prolonged the  $APD_{50}$  and  $APD_{90}$  to  $133 \pm 3\%$  ( $P < 0.05$ ) and  $139 \pm 6\%$  ( $P < 0.05$ ) of the control, respectively. The AP amplitude and resting membrane potential remained unaltered at either concentration (table 1). The AP duration was completely restored to baseline after washout.

### Transient Outward $K^+$ Current

At a membrane potential of +60 mV, 0.35 mM sevoflurane reduced the control peak currents of  $I_{to}$  ( $3.82 \pm 0.54$  nA) by  $18 \pm 2\%$  ( $n = 7$ ;  $P < 0.05$ ), and the plateau currents measured at the end of depolarization ( $1.51 \pm 0.12$  nA) by  $10 \pm 3\%$  ( $n = 7$ ;  $P < 0.05$ ). Sevoflurane, 0.7 mM, reduced peak currents of  $I_{to}$  ( $3.64 \pm 0.30$  nA) by  $24 \pm 2\%$  ( $n = 11$ ;  $P < 0.05$ ) and plateau currents ( $1.52 \pm 0.19$  nA) by  $10 \pm 2\%$  ( $n = 11$ ;  $P < 0.05$ ) (figs. 2A-C). Complete recovery of peak and plateau currents was observed after washout of either concentration (figs. 2A and B).

Under control conditions, the voltage required for half-inactivation ( $V_{1/2}$ ) and slope factor ( $\kappa$ ) for the  $I_{to}$  were  $-31.53 \pm 0.68$  mV and  $-6.23 \pm 0.60$  mV, respectively ( $n = 7$ ). Sevoflurane, 0.7 mM, did not shift the steady

Table 1. Effects of Sevoflurane on Action Potential Characteristics in Isolated Rat Ventricular Myocytes

|                          | RMP, mV     | AMP, mV     | $APD_{50}$ , ms | $APD_{90}$ , ms         |
|--------------------------|-------------|-------------|-----------------|-------------------------|
| 0.35 mM SEVO ( $n = 6$ ) |             |             |                 |                         |
| Control                  | $-74 \pm 2$ | $130 \pm 5$ | $5.52 \pm 1$    | $19.56 \pm 2$           |
| SEVO                     | $-74 \pm 3$ | $127 \pm 6$ | $6.87 \pm 1^*$  | $22.45 \pm 2^*$         |
| Washout                  | $-74 \pm 3$ | $128 \pm 6$ | $6.27 \pm 1$    | $20.24 \pm 2$           |
| 0.7 mM SEVO ( $n = 7$ )  |             |             |                 |                         |
| Control                  | $-74 \pm 2$ | $134 \pm 3$ | $5.29 \pm 0$    | $18.49 \pm 0$           |
| SEVO                     | $-74 \pm 2$ | $128 \pm 4$ | $7.01 \pm 1^*$  | $25.58 \pm 1^{\dagger}$ |
| Washout                  | $-75 \pm 3$ | $129 \pm 5$ | $5.27 \pm 0$    | $17.02 \pm 1$           |

Values represent mean  $\pm$  SEM.

\*  $P < 0.05$ , different from control and washout values.  $\dagger P < 0.05$ , different from 0.35 mM sevoflurane (SEVO).

AMP = action potential amplitude;  $APD_{50}$  = action potential duration measured at 50% of repolarization;  $APD_{90}$  = action potential duration measured at 90% of repolarization; RMP = resting membrane potential.

state inactivation curve ( $V_{1/2} = -35.04 \pm 0.84$  mV,  $\kappa = -7.40 \pm 0.74$ ,  $n = 7$ ; not significant) (fig. 3).

Because application of 0.7 mM sevoflurane in figure 2A indicated that sevoflurane accelerated the decay of current during the pulse, we evaluated the effect of sevoflurane on the kinetics of inactivation of  $I_{to}$ . Individual current records evoked by a test pulse to +60 mV were fitted with a double exponential function. Figures 4A and B show quality of fit of the double exponential function to the inactivation phase of  $I_{to}$  under control conditions and in the presence of 0.7 mM sevoflurane, respectively. The control  $\tau_1$  ( $47 \pm 3$  ms) was reduced to  $27 \pm 3$  ms by 0.7 mM sevoflurane ( $n = 7$ ;  $P < 0.05$ ). Inactivation kinetics returned to baseline values after washout ( $47 \pm 4$  ms) (fig. 4C).

Figure 5 shows the inhibition of  $I_{to}$  by 0.35 and 0.7 mM sevoflurane during depolarization. The inhibition increased in a hyperbolic manner during depolarization. Both the magnitude of the maximum inhibition and the rate of development of the maximum inhibition seemed to be concentration dependent. The  $B_{max}$  values of 0.35

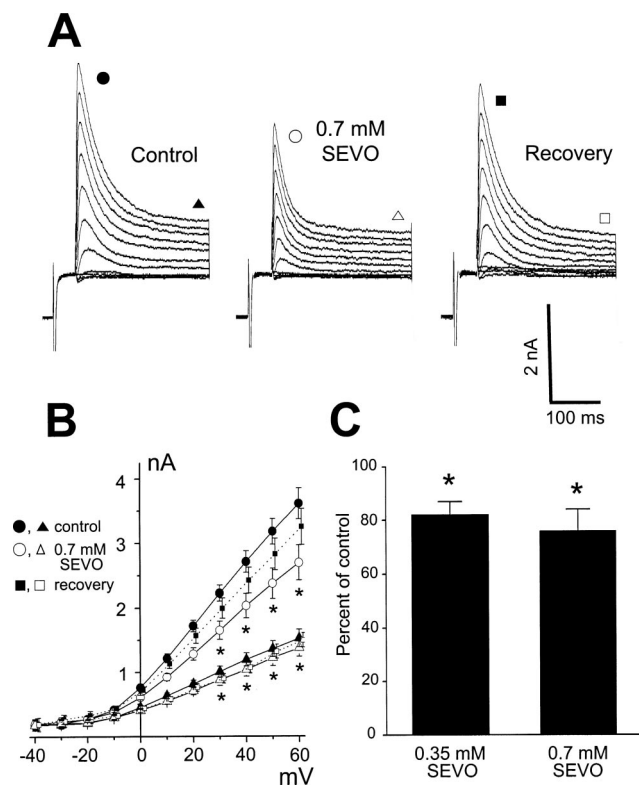

**Fig. 2.** Effects of sevoflurane (SEVO) on transient outward  $K^+$  currents ( $I_{to}$ ) in rat ventricular myocytes. (A) Recordings of control, 0.7 mM SEVO, and recovery in a rat ventricular myocyte. (B) Current-voltage relations of  $I_{to}$ . Closed and open circles indicate the peak current of  $I_{to}$  at every potential in the control and in the presence of 0.7 mM SEVO. Squares are the peak (closed) and plateau (open) currents after washout. Dotted lines also indicate recovery. Triangles are the plateau current levels at the end of the test pulses before (closed) and after (open) application of 0.7 mM SEVO. (C) Effect of 0.35 and 0.7 mM SEVO on the amplitude of peak  $I_{to}$  at +60 mV. \*  $P < 0.05$  versus control. Error bars indicate mean  $\pm$  SEM.

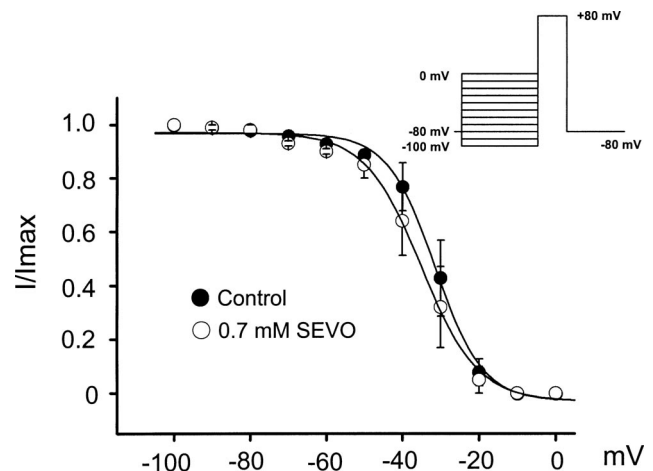

**Fig. 3.** Steady state inactivation curves of transient outward  $K^+$  currents under control conditions and in the presence of 0.7 mM sevoflurane (SEVO). Closed and open circles indicate control and 0.7 mM SEVO, respectively. Data are presented as mean  $\pm$  SEM for four cells and were fitted with the Boltzmann function. The half-inactivations ( $V_{1/2}$ ) of control and 0.7 mM SEVO were  $-31.53 \pm 0.68$  and  $-35.04 \pm 0.84$  mV, respectively, which showed no differences. Error bars indicate mean  $\pm$  SEM.

and 0.7 mM sevoflurane were 0.6 ( $n = 7$ ) and 0.82 ( $n = 8$ ), respectively. The  $K_d$  values of 0.35 and 0.7 mM sevoflurane were 19.66 ms ( $n = 7$ ) and 15.84 ms ( $n = 8$ ), respectively.

#### Sustained Outward Current

Representative tracings of isolated  $I_{sus}$  by application of 5 mM 4-aminopyridine are illustrated in figures 6A and B. Sevoflurane, 0.7 mM, had no effect on the  $I_{sus}$  ( $n = 6$ ) (fig. 6C). Before sevoflurane exposure, the baseline value of  $I_{sus}$  at the end of the plateau during test potential of +60 mV was  $1.31 \pm 0.12$  nA ( $n = 6$ ).

#### Inward Rectifier $K^+$ Current

At membrane potential ranges from  $-130$  to  $0$  mV, 0.7 mM sevoflurane did not alter the  $I_{KI}$  ( $n = 7$ ; not significant) (fig. 7B). The  $I_{KI}$  was measured at the end of the pulse duration. Before sevoflurane exposure, the baseline value during test potential of  $-130$  mV was  $-2.92 \pm 0.25$  nA.

#### L-type $Ca^{2+}$ Current

At a membrane potential of +10 mV, 0.35 and 0.7 mM sevoflurane reduced the  $I_{Ca, L}$  by  $28 \pm 3\%$  ( $n = 8$ ;  $P < 0.05$ ) and  $33 \pm 1\%$  ( $n = 7$ ;  $P < 0.05$ ), respectively (fig. 8B). The effect of sevoflurane on  $I_{Ca, L}$  was completely reversible after washout. The baseline values before exposure to 0.35 and 0.7 mM sevoflurane were  $0.75 \pm 0.09$  and  $0.81 \pm 0.2$  nA, respectively.

## Discussion

This study shows that clinically relevant concentrations of sevoflurane prolong the AP duration and signif-

icantly inhibit the  $I_{to}$  and  $I_{Ca,L}$  in isolated rat ventricular myocytes. Although sevoflurane did not shift the steady state inactivation curve, it significantly accelerated inactivation of  $I_{to}$ .

Prolongation of the ventricular AP duration by sevoflurane has been observed in guinea pigs,<sup>7-9</sup> whereas other studies using canine ventricular cells<sup>11</sup> or guinea pig papillary muscles<sup>10</sup> have reported shortening of the AP duration. In a study using rat ventricular cells, sevoflurane caused modest but significant shortening of AP duration,<sup>12</sup> a curious difference from our study despite use of the same animal species.

In rat ventricular myocytes, cardiac voltage-activated  $K^+$  current consists of  $I_{to}$  and  $I_K$ , sensitive to 4-aminopyridine and tetraethylammonium, respectively.<sup>20</sup> In frog and guinea pig ventricular myocytes, the dominant voltage-activated outward  $K^+$  current is  $I_K$ .<sup>22,23</sup> However, in rat, dog, rabbit, and human myocytes,  $I_{to}$  is prominent and plays a significant role in the early repolarization phase of the AP.<sup>24-27</sup> In several cardiac tissues, two types of  $I_{to}$  have

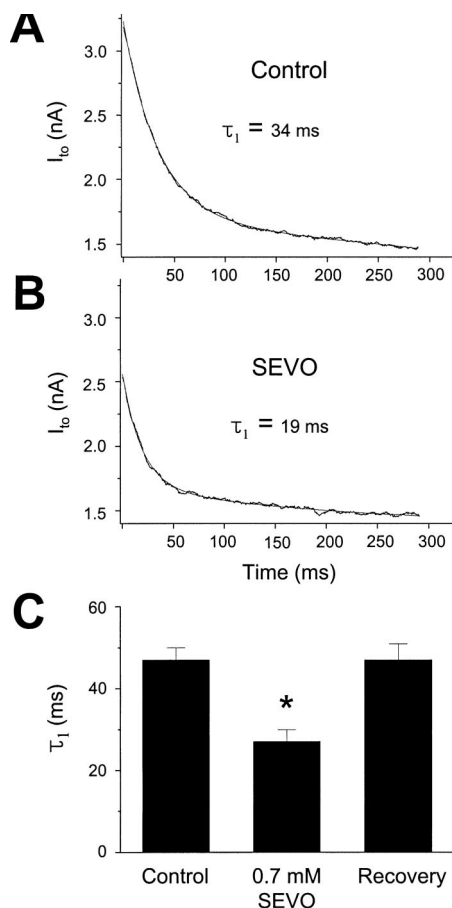

**Fig. 4.** Effect of sevoflurane (SEVO) on current inactivation. The inactivation phase of transient outward  $K^+$  currents ( $I_{to}$ ) were best fitted by a double exponential function under control conditions (A) and in the presence of 0.7 mM SEVO (B) in a rat ventricular myocyte. Mean values ( $\pm$  SEM) of  $\tau_1$  ( $n = 7$ ) under control conditions, in the presence of 0.7 mM SEVO, and after washout (C). \* $P < 0.05$  versus control and recovery. Error bars indicate mean  $\pm$  SEM.

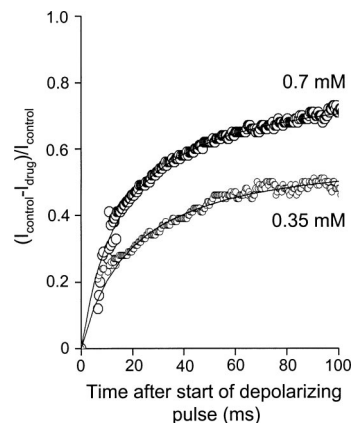

**Fig. 5.** Time-dependent inhibition of transient outward  $K^+$  currents ( $I_{to}$ ) by sevoflurane. Time course of the development of the inhibition by 0.35 mM ( $n = 7$ ) and 0.7 mM ( $n = 8$ ) sevoflurane after a depolarizing pulse to +60 mV from a holding potential of -40 mV. The reduction of  $I_{to}$  in the presence of sevoflurane is expressed as a proportion of the control current at any given time after the start of the depolarizing pulse.

been identified; one is voltage- and  $Ca^{2+}$ -independent, and the other is  $Ca^{2+}$ -dependent.<sup>28,29</sup> In rat ventricular myocytes, only a  $Ca^{2+}$ -independent  $I_{to}$  has been identified.<sup>30</sup> The  $Ca^{2+}$ -independent  $I_{to}$ , carried predominantly by  $K^+$  ions, has been suggested to be a major determinant of the cardiac AP duration because of its large size and pronounced frequency dependence.<sup>29</sup>

Rithalia *et al.*,<sup>12</sup> in their study using rat ventricular subendocardial and subepicardial myocytes, observed no changes of  $I_{to}$  by application of 0.6 mM sevoflurane

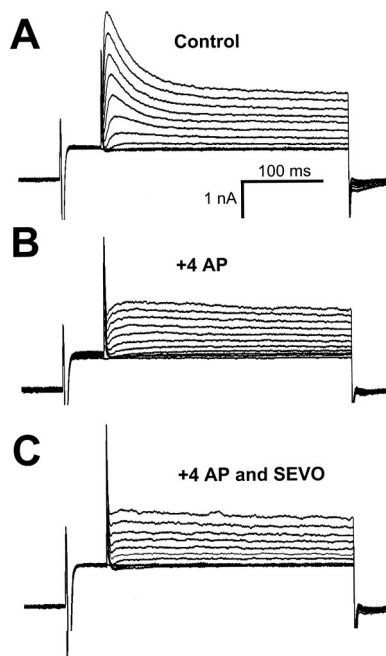

**Fig. 6.** Effect of sevoflurane (SEVO) on sustained outward currents ( $I_{sus}$ ) in a rat ventricular myocyte. (A) A control recording of transient outward  $K^+$  currents ( $I_{to}$ ). (B)  $I_{sus}$  obtained after application of 5 mM 4-aminopyridine (4-AP), which preferentially blocks  $I_{to}$ . (C) 0.7 mM SEVO exposure after application of 5 mM 4-aminopyridine.

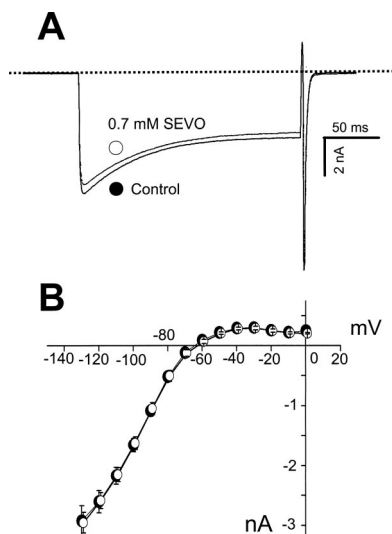

**Fig. 7.** Effect of sevoflurane (SEVO) on inward rectifier  $K^+$  current ( $I_{K1}$ ) in rat ventricular myocytes. (A) Closed and open circles indicate control and 0.7 mM SEVO in a rat ventricular myocyte, respectively, at a membrane potential of  $-130$  mV. (B) Current-voltage relations for  $I_{K1}$  before and after addition of 0.7 mM SEVO ( $n = 7$ ). Closed and open circles indicate control and 0.7 mM SEVO, respectively. Error bars indicate mean  $\pm$  SEM.

( $30^\circ\text{C}$ ). In contrast, we found that sevoflurane caused a modest but significant depression of approximately 24% by 0.7 mM sevoflurane ( $22^\circ\text{C}$ ). In a recent study using cloned human cardiac  $K^+$  channels, 3 mM sevoflurane inhibited the Kv4.3 cardiac  $K^+$  channel currents by approximately 28% ( $35^\circ\text{C}$ ), suggesting inhibition of  $I_{to}$ .<sup>9</sup> Kv4.3 channel has been reported to underlie a significant fraction of  $I_{to}$  in the heart of several species, including rat, canine, and human.<sup>31</sup> Considering lower solubility at higher temperatures, the 0.6 mM sevoflurane at  $30^\circ\text{C}$  is estimated to be around 0.7 mM at  $22^\circ\text{C}$ .<sup>7</sup> Despite application of a similar concentration in the same animal species, it remains unclear why a disparity exists between the result of Rithalia *et al.* and ours. In the above study using cloned human cardiac  $K^+$  channels, 0.43 mM sevoflurane at  $37^\circ\text{C}$  will be approximately 0.7 mM at  $22^\circ\text{C}$ .<sup>7</sup> Although a 0.43 mM concentration of sevoflurane caused modest depression of the Kv4.3 cardiac  $K^+$  channel currents, significant acceleration of the rate of decay was shown at this concentration,<sup>9</sup> indicating a possible significant open channel inhibition in clinically relevant concentrations of sevoflurane. Considering the similar electrophysiologic characteristics of  $I_{to}$  between human and rat ventricular myocytes,<sup>16</sup> reduction of  $I_{to}$  in our results seems to correspond to that of Kang *et al.*<sup>9</sup> The prolongation of AP duration as a result of inhibition of  $I_{to}$  has been demonstrated with tedisamil, a blocker of  $I_{to}$  and  $I_K$  in isolated rat ventricular myocytes,<sup>32</sup> and was similar to that reported in isolated rat papillary muscles.<sup>33</sup> Our findings of approximately 24% reduction of  $I_{to}$  appear as a small fractional reduction. However, considering the large current density in rat ventricular myocytes,  $19.9 \pm 2.8$  pA/pF at the membrane potential of

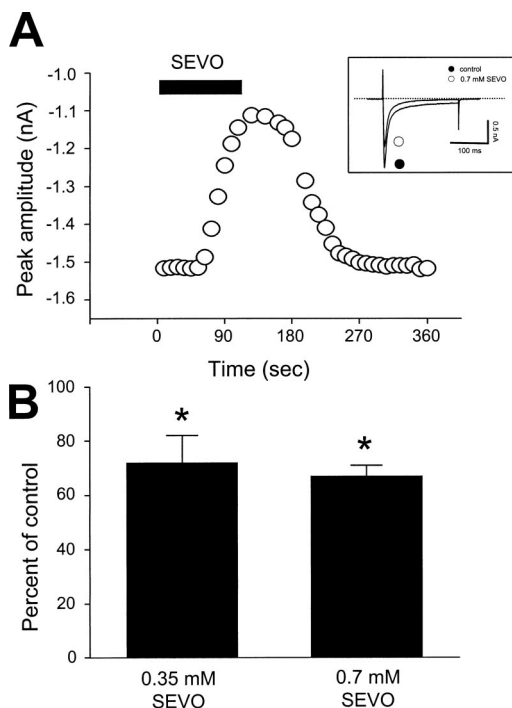

**Fig. 8.** Effect of sevoflurane (SEVO) on L-type  $Ca^{2+}$  current ( $I_{Ca,L}$ ). (A) A representative example of the effect of SEVO on  $I_{Ca,L}$  in a rat ventricular myocyte. The open circles represent the peak of an individual current record. The horizontal bar indicates the period when SEVO was applied. (Inset) An example of individual currents recorded in the presence of 0.7 mM SEVO. (B) Depression of  $I_{Ca,L}$  after application of 0.35 and 0.7 mM SEVO, respectively. \*  $P < 0.05$  versus control. Error bars indicate mean  $\pm$  SEM.

+60 mV,<sup>16</sup> the effect on the plateau phase will be greater, resulting in AP prolongation.

The current study shows that sevoflurane decreased the peak  $I_{to}$  and also accelerated the rate of decay. The acceleration of the rate of decay could be explained by an anesthetic-induced acceleration of the normal conversion of open channels to an inactivated state with sustained depolarization. Sevoflurane could preferentially inhibit the open state of the channel. These findings are similar to that previously reported in rat ventricular  $I_{to}$  for quinidine (class Ia antiarrhythmic agent),<sup>34</sup> clofilium,<sup>35</sup> tedisamil (class III antiarrhythmic agent),<sup>32</sup> bupivacaine,<sup>36</sup> and imipramine in rabbit atrial  $I_{to}$ .<sup>37</sup>

In the current study, whereas there was no inhibition of  $I_{to}$  at the onset of the depolarizing pulses, we observed the inhibition of  $I_{to}$  upon continued depolarization. These results may indicate that sevoflurane does not bind to the resting state of the channel in an inhibitory fashion, but rather inhibits the open channel in a hyperbolic manner during continued depolarization. The lack of any effect on the voltage dependence of the steady state inactivation suggests that sevoflurane does not bind to the inactivated state of the channel.

The sustained outward currents, comprising  $I_K$  and a small time-independent outward current,<sup>18</sup> remain in the presence of 4-aminopyridine and tetraethylammonium.  $I_{sus}$  contributes to the overall repolarization process in

rat ventricular myocytes. Whereas 0.7 mM sevoflurane has been reported to significantly depress the  $I_{K1}$  in guinea pig ventricular cells, approximately 60%,<sup>7</sup>  $I_{sus}$  was not affected by sevoflurane. Although suppression of  $I_{K1}$  by sevoflurane in guinea pig ventricular myocytes is mainly responsible for the AP prolongation,  $I_{sus}$  does not likely contribute to the prolongation of AP duration by sevoflurane in rat ventricular myocytes. Presumably, little  $I_{sus}$  change by sevoflurane may be attributed to marked variations among cells in rat ventricle in the relative amplitudes of  $I_{to}$  and  $I_{K1}$  ( $I_{to}/I_{K1}$ ),<sup>21</sup> significant inhibition of  $I_{K1}$  by 4-aminopyridine at concentrations above 1 mM,<sup>18</sup> and/or species differences.

The  $I_{K1}$  is the primary current responsible for maintaining a stable cardiac resting membrane potential near the  $K^+$  equilibrium potential. Inhibition of  $I_{K1}$  can result in diastolic depolarization, which can increase cardiac excitability<sup>38</sup> and lead to dysrhythmias and abnormal automaticity.<sup>39</sup> Both sevoflurane and isoflurane have been reported to cause significant depression of inward component and enhancement of outward component of  $I_{K1}$  in guinea pig ventricular myocytes.<sup>40,41</sup> However, the actual differences from baseline values seemed to be modest, suggesting minimal effect on  $I_{K1}$  by these anesthetics. Modest effects on inward and outward components of  $I_{K1}$  by sevoflurane have been reported in guinea pig ventricular myocytes,<sup>7</sup> and our results in rat ventricular myocytes also showed no depression of the inward component of  $I_{K1}$  by sevoflurane. The lack of change in the resting membrane potential after application of 0.7 mM sevoflurane in our results may also reflect the lack of effect on  $I_{K1}$ .

In the current study on steady state inactivation of  $I_{to}$ , approximately 80% of the channels seemed to be available for activation at  $-40$  mV. This indicates that the outward component of  $I_{K1}$  above  $-40$  mV may include  $I_{to}$  and thus can influence the outward component of  $I_{K1}$  in this preparation.

Our whole cell voltage clamp studies revealed a reduction of peak  $I_{Ca,L}$  despite the prolongation of AP duration. Suppression of  $I_{Ca,L}$  by sevoflurane has been reported in various animal preparations.<sup>7,9,11,12</sup> Inhibition of  $I_{Ca,L}$  can lead to a shortening of AP duration, however, the reduction of  $I_{to}$  would seem to have a greater effect, resulting in lengthening of the AP duration.

In human ventricular myocytes, although the current density of  $I_{to}$  has been reported to be two or three times smaller than that of the rat myocytes ( $8.2 \pm 0.7$  pA/pF at  $+60$  mV), it is, nonetheless, a major outward current in human myocytes.<sup>16</sup> Small changes of  $I_{to}$  during the early phase of the AP can profoundly affect the activation of other plateau currents, such as  $Ca^{2+}$  and the delayed outward  $K^+$  currents, influencing the AP duration and  $Ca^{2+}$  influx.<sup>27</sup>

In conclusion, prolongation of AP duration, induced by clinically relevant concentrations of sevoflurane, appears

due to the suppression of  $I_{to}$  in rat ventricular myocytes. Considering that the voltage and time dependence of  $I_{to}$  in human ventricular myocytes are similar to those found in rat heart cells<sup>16</sup> and prolongation of AP duration in failing human heart seems to be prominently caused by a reduction in the level of  $Kv4.3$  mRNA, resulting in down-regulation of  $Ca^{2+}$ -independent  $I_{to}$ ,<sup>42</sup> suppression of  $I_{to}$  by sevoflurane may partly account for the clinical observation of QTc prolongation in humans. In addition, considering the presence of  $I_{ks}$  in healthy human ventricle,<sup>43,44</sup> inhibition of  $I_{ks}$  by sevoflurane<sup>8</sup> may also contribute to QTc prolongation.

## References

1. Kleinsasser A, Kuenszberg E, Loeckinger A, Keller C, Hoermann C, Lindner KH, Puehringer F: Sevoflurane, but not propofol, significantly prolongs the QT interval. *Anesth Analg* 2000; 90:25-7
2. Kuenszberg E, Loeckinger A, Kleinsasser A, Lindner KH, Puehringer F, Hoermann C: Sevoflurane progressively prolongs the QT interval in unpremedicated female adults. *Eur J Anaesthesiol* 2000; 17:662-4
3. Loeckinger A, Kleinsasser A, Maier S, Furtner B, Keller C, Kuehbachner G, Lindner KH: Sustained prolongation of the QTc interval after anesthesia with sevoflurane in infants during the first 6 months of life. *ANESTHESIOLOGY* 2003; 98:639-42
4. Whyte SD, Booker PD, Buckley DG: The effects of propofol and sevoflurane on the QT interval and transmural dispersion of repolarization in children. *Anesth Analg* 2005; 100:71-7
5. Gallagher JD, Weindling SN, Anderson G, Fillinger MP: Effects of sevoflurane on QT interval in a patient with congenital long QT syndrome. *ANESTHESIOLOGY* 1998; 89:1569-73
6. Saussine M, Massad I, Raczkza F, Davy J-M, Frapier J-M: Torsade de pointes during sevoflurane anesthesia in a child with congenital long QT syndrome. *Paediatr Anaesth* 2006; 16:63-5
7. Park WK, Pancrazio JJ, Suh CK, Lynch C III: Myocardial depressant effects of sevoflurane: Mechanical and electrophysiologic actions *in vitro*. *ANESTHESIOLOGY* 1996; 84:1166-76
8. Shibata S, Ono K, Iijima T: Sevoflurane inhibition of the slowly activating delayed rectifier  $K^+$  current in guinea pig ventricular cells. *J Pharmacol Sci* 2004; 95:363-73
9. Kang J, Reynolds WP, Chen X-L, Ji J, Wang H, Rampe DE: Mechanisms underlying the QT interval-prolonging effects of sevoflurane and its interactions with other QT-prolonging drugs. *ANESTHESIOLOGY* 2006; 104:1015-22
10. Azuma M, Matsumura C, Kemmotsu O: The effects of sevoflurane on contractile and electrophysiologic properties in isolated guinea pig papillary muscles. *Anesth Analg* 1996; 82:486-91
11. Hatakeyama N, Momose Y, Ito Y: Effects of sevoflurane on contractile responses and electrophysiologic properties in canine single cardiac myocytes. *ANESTHESIOLOGY* 1995; 82:559-65
12. Rithalia A, Hopkins PM, Harrison SM: The effects of halothane, isoflurane, and sevoflurane on  $Ca^{2+}$  current and transient outward  $K^+$  current in subendocardial and subepicardial myocytes from the rat left ventricle. *Anesth Analg* 2004; 99:1615-22
13. Carmeliet E: Mechanisms and control of repolarization. *Eur Heart J* 1993; 14:3-13
14. Coraboeuf E: Ionic basis of electrical activity in cardiac tissues. *Am J Physiol* 1978; 234:H101-16
15. Rees S, Curtis MJ: Which cardiac potassium channel subtype is the preferable target for suppression of ventricular arrhythmias? *Pharmacol Ther* 1996; 69:199-217
16. Wettwer E, Amos G, Gath J, Zerkowski H-R, Reidemeister J-C, Ravens U: Transient outward current in human and rat ventricular myocytes. *Cardiovasc Res* 1993; 27:1662-9
17. Hamill OP, Marty A, Neher E, Sakmann B, Sigworth FJ: Improved patch-clamp techniques for high-resolution current recording from cells and cell-free membrane patches. *Pflügers Arch* 1981; 391:85-100
18. Slawsky MT, Castle NA:  $K^+$  channel blocking actions of flecainide compared with those of propafenone and quinidine in adult rat ventricular myocytes. *J Pharmacol Exp Ther* 1994; 269:66-74
19. He J, Kargacin ME, Kargacin GJ, Ward CA: Tamoxifen inhibits  $Na^+$  and  $K^+$  currents in rat ventricular myocytes. *Am J Physiol* 2003; 285:H661-8
20. Apkon M, Nerbonne JM: Characterization of two distinct depolarization-activated  $K^+$  currents in isolated adult rat ventricular myocytes. *J Gen Physiol* 1991; 97:973-1011
21. Hönemann CW, Washington J, Hönemann MC, Nietgen GW, Durieux ME:

Partition coefficients of volatile anesthetics in aqueous electrolyte solutions at various temperatures. *ANESTHESIOLOGY* 1998; 89:1032-5

22. Hume JR, Giles W: Ionic currents in single isolated bullfrog atrial cells. *J Gen Physiol* 1983; 81:153-94

23. Hume JR, Uehara A: Ionic basis of the different action potential configurations of single guinea-pig atrial and ventricular myocytes. *J Physiol (Lond)* 1985; 368:525-44

24. Josephson IR, Sanchez-Chapula J, Brown AM: Early outward current in rat single ventricular cells. *Circ Res* 1984; 54:157-62

25. Litovsky SH, Antzelevitch C: Transient outward current prominent in canine ventricular epicardium but not endocardium. *Circ Res* 1988; 62:116-26

26. Giles W, Shimoni Y: Comparison of sodium-calcium exchanger and transient inward currents in single cells from rabbit ventricle. *J Physiol (Lond)* 1989; 417:465-81

27. Näbauer M, Beuckelmann DJ, Erdmann E: Characteristics of transient outward current in human ventricular myocytes from patients with terminal heart failure. *Circ Res* 1993; 73:386-94

28. Coraboeuf E, Camelier E: Existence of two transient outward currents in sheep cardiac Purkinje fibers. *Pflugers Arch* 1982; 392:352-9

29. Escande D, Coulombe A, Faivre J-F, Deroubaix E, Coraboeuf E: Two types of transient outward currents in adult human atrial cells. *Am J Physiol* 1987; 252:H142-8

30. Dukes ID, Morad M: The transient  $K^+$  current in rat ventricular myocytes: evaluation of its  $Ca^{2+}$  and  $Na^+$  dependence. *J Physiol (Lond)* 1991; 435:395-420

31. Dixon JE, Shi W, Wang H, McDonald C, Yu H, Wymore RS, Cohen IS, McKinnon D: Role of the  $Kv4.3$   $K^+$  channel in ventricular muscle: A molecular correlate for the transient outward current. *Circ Res* 1996; 79:659-68

32. Dukes ID, Cleemann L, Morad M: Tedisamil blocks the transient and delayed rectifier  $K^+$  currents in mammalian cardiac and glial cells. *J Pharmacol Exp Ther* 1990; 254:560-9

33. Walker MJ, Beatch GN: Electrically induced arrhythmias in the rat. *Proc West Pharmacol Soc* 1988; 31:167-70

34. Imaizumi Y, Giles WR: Quinidine-induced inhibition of transient outward current in cardiac muscle. *Am J Physiol* 1987; 253:H704-8

35. Castle NA: Selective inhibition of potassium currents in rat ventricle by clofilium and its tertiary homolog. *J Pharmacol Exp Ther* 1991; 257:342-50

36. Castle NA: Bupivacaine inhibits the transient outward  $K^+$  current but not the inward rectifier in rat ventricular myocytes. *J Pharmacol Exp Ther* 1990; 255:1038-46

37. Delpón E, Tamargo J, Sánchez-Chapula J: Effects of imipramine on the transient outward current in rabbit atrial single cells. *Br J Pharmacol* 1992; 106:464-9

38. Nichols CG, Makhina EN, Pearson WL, Sha Q, Lopatin AN: Inward rectification and implications for cardiac excitability. *Circ Res* 1996; 78:1-7

39. The Sicilian Gambit: A new approach to the classification of antiarrhythmic drugs based on their actions on arrhythmogenic mechanisms. Task Force of the Working Group on Arrhythmias of the European Society of Cardiology. *Circulation* 1991; 84:1831-51

40. Stadnicka A, Bosnjak ZJ, Kampine JP, Kwok W-M: Effects of sevoflurane on inward rectifier  $K^+$  current in guinea pig ventricular cardiomyocytes. *Am J Physiol* 1997; 273: H324-32

41. Stadnicka A, Bosnjak ZJ, Kampine JP, Kwok W-M: Modulation of cardiac inward rectifier  $K^+$  current by halothane and isoflurane. *Anesth Analg* 2000; 90:824-33

42. Kääb S, Dixon J, Duc J, Ashen D, Näbauer M, Beuckelmann DJ, Steinback G, McKinnon D, Tomaselli GF: Molecular basis of transient outward potassium current downregulation in human heart failure. *Circulation* 1998; 98:1383-93

43. Li GR, Feng J, Yue L, Carrier M, Nattel S: Evidence for two components of delayed rectifier  $K^+$  current in human ventricular myocytes. *Circ Res* 1996; 78:689-96

44. Virág L, Iost N, Opincariu M, Szolnoky J, Szecsi J, Bogáts G, Szenohradzky P, Varró A Papp JG: The slow component of the delayed rectifier potassium current in undiseased human ventricular myocytes. *Cardiovasc Res* 2001; 49:790-7
